# Supplementary material
Source: PubMed Central journal article supplement (PMC5536179)
Supplement: NIHMS803353-supplement-Supplementary_Appendix.pdf [file NIHMS803353-supplement-Supplementary_Appendix.pdf]

## Supplementary Appendix

This appendix has been provided by the authors to give readers additional information about their work.

Supplement to: Chen CL, Lin GA, Bardach NS, et al. Preoperative medical testing in Medicare patients undergoing cataract surgery. *N Engl J Med* 2015;372:1530-8. DOI: [10.1056/NEJMsa1410846](https://doi.org/10.1056/NEJMsa1410846)

**Preoperative Medical Testing Prior to Cataract Surgery in Medicare Patients**

**SUPPLEMENTARY MATERIALS**

## TABLE OF CONTENTS

1. **Figure S1a:** Receiver operating curves depicting differential contributions of patient characteristics, ophthalmologist and preoperative office visit to the likelihood of preoperative testing
2. **Figure S1b.** Receiver operating curves depicting differential contributions of patient characteristics, ophthalmologist and preoperative office visit to the likelihood of preoperative testing (*shown without “Ophthalmologist + All Other Variables (without Office Visit) model*)
3. **Table S1:** CPT codes used for specified preoperative tests
4. **Table S2:** Characteristics of cataract surgery patients who did and did not undergo preoperative testing in the 30 days before index cataract surgery (*includes all health system variables*)
5. **Table S3:** Characteristics of cataract surgery patients who did and did not have a preoperative office visit in the 30 days before index cataract surgery
6. **Table S4:** Prevalence and cost of medical services provided in the 30 days before index cataract surgery
7. **Table S5:** Characteristics associated with preoperative testing prior to cataract surgery (*models include office visits as a predictor*)
8. **Table S6:** Characteristics associated with having a preoperative office visit prior to cataract surgery

**Figure S1a. Receiver operating curves depicting differential contributions of patient characteristics, ophthalmologist and preoperative office visit to the likelihood of preoperative testing<sup>1</sup>**

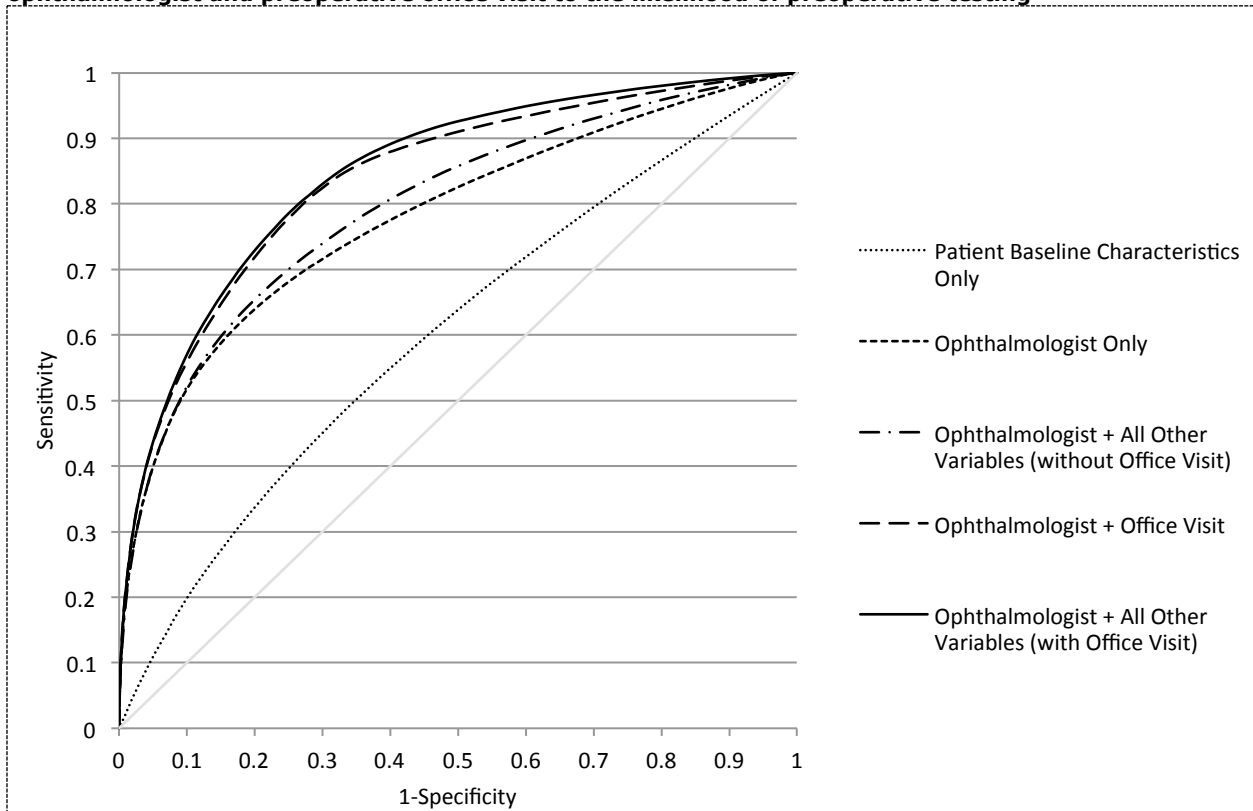

1) C-statistics for each model: patient baseline characteristics: 0.60; ophthalmologist only: 0.78; ophthalmologist plus all other variables except office visit: 0.80; ophthalmologist plus office visit: 0.84; ophthalmologist plus all other variables including office visit: 0.85

**Figure S1b. Receiver operating curves depicting differential contributions of patient characteristics, ophthalmologist and preoperative office visit to the likelihood of preoperative testing<sup>1,2</sup>**

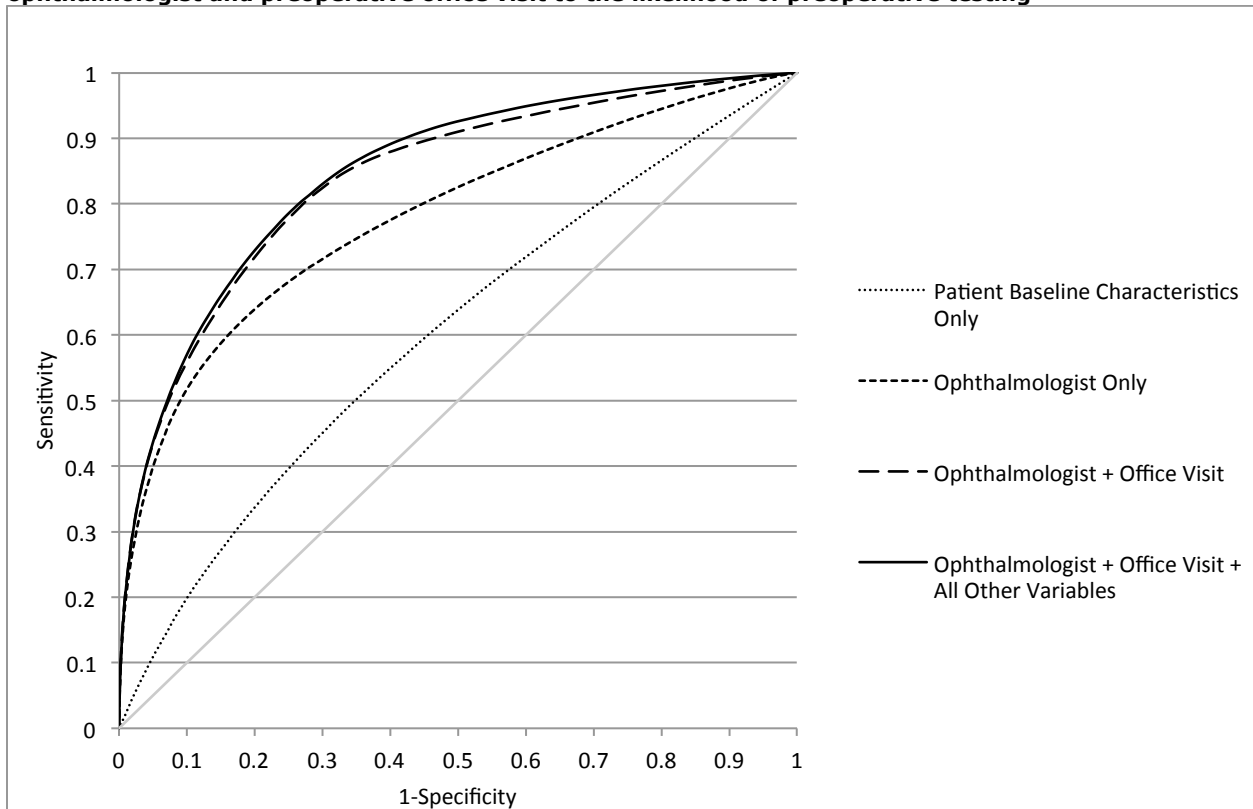

1) C-statistics for each model: patient baseline characteristics: 0.60; ophthalmologist only: 0.78; ophthalmologist plus office visit: 0.84; ophthalmologist plus office visit plus all other variables: 0.85

2) Figure S1b does not depict the model "Ophthalmologist + All Other Variables (without Office Visit)" shown in Figure S1a.

**Table S1: CPT codes used for specified preoperative tests**

| <b>Test grouping</b>     | <b>Preoperative Test Name</b>                                                                               | <b>CPT Code</b>                   |
|--------------------------|-------------------------------------------------------------------------------------------------------------|-----------------------------------|
| Chemistry panel          | Basic metabolic panel (Na, K, Cl, CO2, BUN, Cr, Glucose, iCa/Ca)                                            | 80047, 80048                      |
| Chemistry panel          | Electrolyte panel (Na, K, Cl, CO2)                                                                          | 80051                             |
| Chemistry panel          | Comprehensive metabolic panel (Na, K, Cl, CO2, BUN, Cr, Glu, AST, ALT, Alk phos, Tprot, Albumin, Tbili, Ca) | 80053                             |
| Chemistry panel          | Renal function panel (Na, K, Cl, CO2, BUN, Cr, Glucose, Ca, PO4, Albumin)                                   | 80069                             |
| Chemistry panel          | Hepatic function panel (AST, ALT, Alk phos, TProt, Albumin, TBili, DBili)                                   | 80076                             |
| Chemistry panel          | Calcium, serum                                                                                              | 82310                             |
| Chemistry panel          | Calcium, ionized                                                                                            | 82330                             |
| Chemistry panel          | Bicarbonate                                                                                                 | 82374                             |
| Chemistry panel          | Chloride                                                                                                    | 82435                             |
| Chemistry panel          | Glucose                                                                                                     | 82947                             |
| Chemistry panel          | Magnesium                                                                                                   | 83735                             |
| Chemistry panel          | Phosphorus                                                                                                  | 84100                             |
| Chemistry panel          | Potassium                                                                                                   | 84132                             |
| Chemistry panel          | Sodium                                                                                                      | 84295                             |
| Chemistry panel          | Creatinine                                                                                                  | 82565                             |
| Chemistry panel          | BUN                                                                                                         | 84520                             |
| Chemistry panel          | Albumin                                                                                                     | 82040                             |
| Chemistry panel          | Bilirubin, total                                                                                            | 82247                             |
| Chemistry panel          | Bilirubin, direct                                                                                           | 82248                             |
| Chemistry panel          | Alkaline phosphatase                                                                                        | 84075                             |
| Chemistry panel          | Total protein                                                                                               | 84155                             |
| Chemistry panel          | AST                                                                                                         | 84450                             |
| Chemistry panel          | ALT                                                                                                         | 84460                             |
| Complete blood count     | CBC                                                                                                         | 85025, 85027                      |
| Complete blood count     | Hematocrit                                                                                                  | 85014                             |
| Complete blood count     | Hemoglobin                                                                                                  | 85018                             |
| Complete blood count     | WBC                                                                                                         | 85048                             |
| Complete blood count     | Platelet count                                                                                              | 85049                             |
| Coagulation panel        | PT w/INR                                                                                                    | 85610                             |
| Coagulation panel        | PTT                                                                                                         | 85730                             |
| Urinalysis               | Urinalysis                                                                                                  | 81000, 81001, 81002, 81003, 81005 |
| Electrocardiography      | 12-lead EKG                                                                                                 | 93000, 93005, 93010               |
| Echocardiography         | TTE                                                                                                         | 93306, 93307                      |
| Cardiac stress test      | Stress EKG                                                                                                  | 93015, 93016, 93017, 93018        |
| Cardiac stress test      | Stress echo                                                                                                 | 93350, 93351, +/- 93352           |
| Cardiac stress test      | Stress MRI                                                                                                  | 75561, 75563                      |
| Cardiac stress test      | Myocardial Perfusion Imaging, SPECT                                                                         | 78451, 78452                      |
| Cardiac stress test      | Myocardial Perfusion Imaging, planar                                                                        | 78453, 78454                      |
| Chest radiograph         | CXR                                                                                                         | 71010, 71020                      |
| Pulmonary function tests | Spirometry                                                                                                  | 94010                             |
| Pulmonary function tests | Bronchodilation responsiveness, spirometry pre- and post-bronchodilator administration                      | 94060                             |
| Pulmonary function tests | Plethysmography                                                                                             | 93720, 93721, 93722               |
| Pulmonary function tests | Functional residual capacity or residual volume: helium, nitrogen                                           | 94240                             |
| Pulmonary function tests | Thoracic gas volume                                                                                         | 94260                             |
| Pulmonary function tests | Determination of maldistribution of inspired gas: helium, nitrogen                                          | 94350                             |
| Pulmonary function tests | Airway closing volume                                                                                       | 94370                             |
| Pulmonary function tests | Resistance to airflow                                                                                       | 94360                             |
| Pulmonary function tests | CO diffusing capacity                                                                                       | 94720                             |
| Pulmonary function tests | Membrane diffusion capacity                                                                                 | 94725                             |

**Table S2. Characteristics of cataract surgery patients who did and did not undergo preoperative testing in the 30 days before index cataract surgery (includes all health system variables)<sup>1,2</sup>**

| <b>Patient Characteristics</b>                                    | <b>Preoperative testing<br/>(N= 232,889)</b> | <b>No preoperative testing<br/>(N= 207,968)</b> |
|-------------------------------------------------------------------|----------------------------------------------|-------------------------------------------------|
| Age, mean in years (SD)                                           | 76.5 (6.3)                                   | 75.7 (6.2)                                      |
| <b>Sex</b>                                                        |                                              |                                                 |
| Male                                                              | 40                                           | 40                                              |
| Female                                                            | 60                                           | 60                                              |
| <b>Race</b>                                                       |                                              |                                                 |
| White                                                             | 87                                           | 90                                              |
| Black                                                             | 7                                            | 6                                               |
| Other                                                             | 6                                            | 5                                               |
| <b>Charlson Comorbidity Index</b>                                 |                                              |                                                 |
| 0-1                                                               | 54                                           | 69                                              |
| 2                                                                 | 17                                           | 14                                              |
| 3+                                                                | 29                                           | 17                                              |
| <b>Health System Characteristics</b>                              |                                              |                                                 |
| <b>US region</b>                                                  |                                              |                                                 |
| Northeast                                                         | 23                                           | 10                                              |
| Midwest                                                           | 23                                           | 25                                              |
| South                                                             | 37                                           | 46                                              |
| Mountain West                                                     | 4                                            | 8                                               |
| Pacific West                                                      | 13                                           | 10                                              |
| <b>Population density</b>                                         |                                              |                                                 |
| Urban                                                             | 84                                           | 81                                              |
| Rural                                                             | 16                                           | 19                                              |
| <b>Primary care physicians per 100,000 residents<sup>3</sup></b>  |                                              |                                                 |
| Q1 (43.9-63.3)                                                    | 22                                           | 29                                              |
| Q2 (63.5-69.0)                                                    | 23                                           | 28                                              |
| Q3 (69.1-77.9)                                                    | 26                                           | 24                                              |
| Q4 (78.4-117)                                                     | 30                                           | 19                                              |
| <b>Ophthalmologists per 100,000 residents<sup>3</sup></b>         |                                              |                                                 |
| Q1 (1.6-4.2)                                                      | 24                                           | 30                                              |
| Q2 (4.3-4.7)                                                      | 22                                           | 29                                              |
| Q3 (4.8-5.6)                                                      | 24                                           | 24                                              |
| Q4 (5.7-10.6)                                                     | 31                                           | 17                                              |
| <b>Ophthalmologist annual cataract surgery volume<sup>4</sup></b> |                                              |                                                 |
| Q1 (1-39)                                                         | 29                                           | 20                                              |
| Q2 (40-68)                                                        | 26                                           | 24                                              |
| Q3 (69-120)                                                       | 24                                           | 27                                              |
| Q4 (121-662)                                                      | 20                                           | 30                                              |
| <b>Medicare expenditures per beneficiary in HRR (2010 USD)</b>    |                                              |                                                 |
| Q1 (\$6,911-\$8,689)                                              | 25                                           | 25                                              |
| Q2 (\$8,691-\$9,674)                                              | 24                                           | 26                                              |
| Q3 (\$9,693-\$10,311)                                             | 27                                           | 24                                              |
| Q4 (\$10,341-\$13,824)                                            | 24                                           | 25                                              |
| <b>Surgical Setting</b>                                           |                                              |                                                 |
| Ambulatory surgery center                                         | 64                                           | 71                                              |
| Hospital outpatient department                                    | 34                                           | 28                                              |
| Unknown                                                           | 2                                            | 1                                               |
| <b>Preoperative Office Visit</b>                                  |                                              |                                                 |
| Yes                                                               | 73                                           | 28                                              |
| No                                                                | 27                                           | 72                                              |

1) All numbers shown as column percent unless otherwise specified.

2) P-values for all variables were less than 0.001.

3) HRR variables current as of 2006.

4) Ophthalmologist annual cataract surgery volume was calculated for the year 2011 using Medicare billing data.

**Table S3. Characteristics of cataract surgery patients who did and did not have a preoperative office visit in the 30 days before index cataract surgery<sup>1,2</sup>**

| <b>Patient Characteristics</b>                                    | <b>Preoperative office visit<br/>(N=229,832)</b> | <b>No preoperative office visit<br/>(N=211,025)</b> |
|-------------------------------------------------------------------|--------------------------------------------------|-----------------------------------------------------|
| Age, mean in years (SD)                                           | 76.4 (6.3)                                       | 75.8 (6.2)                                          |
| <b>Sex</b>                                                        |                                                  |                                                     |
| Male                                                              | 40                                               | 41                                                  |
| Female                                                            | 60                                               | 59                                                  |
| <b>Race</b>                                                       |                                                  |                                                     |
| White                                                             | 88                                               | 89                                                  |
| Black                                                             | 6                                                | 6                                                   |
| Other                                                             | 6                                                | 5                                                   |
| <b>Charlson Comorbidity Index</b>                                 |                                                  |                                                     |
| 0-1                                                               | 57                                               | 66                                                  |
| 2                                                                 | 16                                               | 14                                                  |
| 3+                                                                | 27                                               | 20                                                  |
| <b>Health System Characteristics</b>                              |                                                  |                                                     |
| <b>US region</b>                                                  |                                                  |                                                     |
| Northeast                                                         | 23                                               | 10                                                  |
| Midwest                                                           | 24                                               | 24                                                  |
| South                                                             | 37                                               | 46                                                  |
| Mountain West                                                     | 4                                                | 8                                                   |
| Pacific West                                                      | 12                                               | 11                                                  |
| <b>Population density</b>                                         |                                                  |                                                     |
| Urban                                                             | 86                                               | 79                                                  |
| Rural                                                             | 14                                               | 21                                                  |
| <b>Primary care physicians per 100,000 residents<sup>3</sup></b>  |                                                  |                                                     |
| Q1 (43.9-63.3)                                                    | 21                                               | 30                                                  |
| Q2 (63.5-69.0)                                                    | 22                                               | 28                                                  |
| Q3 (69.1-77.9)                                                    | 27                                               | 22                                                  |
| Q4 (78.4-117)                                                     | 29                                               | 20                                                  |
| <b>Ophthalmologists per 100,000 residents<sup>3</sup></b>         |                                                  |                                                     |
| Q1 (1.6-4.2)                                                      | 23                                               | 31                                                  |
| Q2 (4.3-4.7)                                                      | 21                                               | 29                                                  |
| Q3 (4.8-5.6)                                                      | 24                                               | 23                                                  |
| Q4 (5.7-10.6)                                                     | 32                                               | 17                                                  |
| <b>Ophthalmologist annual cataract surgery volume<sup>4</sup></b> |                                                  |                                                     |
| Q1 (1-39)                                                         | 28                                               | 21                                                  |
| Q2 (40-68)                                                        | 27                                               | 23                                                  |
| Q3 (69-120)                                                       | 24                                               | 27                                                  |
| Q4 (121-662)                                                      | 21                                               | 29                                                  |
| <b>Medicare expenditures per beneficiary in HRR (2010 USD)</b>    |                                                  |                                                     |
| Q1 (\$6,911-\$8,689)                                              | 25                                               | 26                                                  |
| Q2 (\$8,691-\$9,674)                                              | 25                                               | 25                                                  |
| Q3 (\$9,693-\$10,311)                                             | 26                                               | 24                                                  |
| Q4 (\$10,341-\$13,824)                                            | 24                                               | 25                                                  |
| <b>Surgical Setting</b>                                           |                                                  |                                                     |
| Ambulatory surgery center                                         | 67                                               | 68                                                  |
| Hospital outpatient department                                    | 32                                               | 31                                                  |
| Unknown                                                           | 1                                                | 2                                                   |

1) All numbers shown as column percent unless otherwise specified.

2) P-values for all variables were less than 0.001.

3) HRR variables current as of 2006.

4) Ophthalmologist annual cataract surgery volume was calculated for the year 2011 using Medicare billing data.



**Table S4. Prevalence and cost of medical services provided in the 30 days before index cataract surgery**

| Type of medical service              | Number of beneficiaries receiving medical service <sup>1</sup> (%) | Number of medical services performed <sup>1</sup> | Annual cost USD   | Change in number of services over baseline period <sup>2</sup> (%) | Change in cost over baseline period <sup>2</sup> USD (%) |
|--------------------------------------|--------------------------------------------------------------------|---------------------------------------------------|-------------------|--------------------------------------------------------------------|----------------------------------------------------------|
| Chemistry panel                      | 160,518 (36.4)                                                     | 257,280                                           | 2,899,982         | 91,737 (55.4)                                                      | 1,068,376 (58.3)                                         |
| Complete blood count                 | 131,776 (29.9)                                                     | 154,523                                           | 1,562,794         | 68,782 (80.2)                                                      | 681,006 (77.2)                                           |
| Electrocardiography                  | 123,081 (27.9)                                                     | 163,519                                           | 2,507,544         | 113,067 (224.1)                                                    | 1,832,568 (271.5)                                        |
| Urinalysis                           | 49,897 (11.3)                                                      | 57,073                                            | 226,028           | 17,820 (45.4)                                                      | 70,715 (45.5)                                            |
| Coagulation panel (PT, PTT)          | 46,967 (10.7)                                                      | 85,453                                            | 520,598           | 23,671 (38.3)                                                      | 162,078 (45.2)                                           |
| Chest radiograph                     | 23,819 (5.4)                                                       | 40,406                                            | 1,218,825         | -1,190 (-2.9)                                                      | 43,317 (3.7)                                             |
| Echocardiography                     | 9,034 (2.0)                                                        | 11,981                                            | 2,775,937         | 498 (4.3)                                                          | 117,798 (4.4)                                            |
| Cardiac stress test                  | 6,379 (1.4)                                                        | 17,559                                            | 3,964,011         | 3,486 (24.8)                                                       | 808,873 (25.6)                                           |
| Pulmonary function tests             | 4,393 (1.0)                                                        | 10,356                                            | 473,704           | 496 (5.0)                                                          | 19,732 (4.3)                                             |
| <b>All preoperative tests</b>        | <b>232,889 (52.8)</b>                                              | <b>798,150</b>                                    | <b>16,149,424</b> | <b>318,366 (66.4)</b>                                              | <b>4,804,462 (42.3)</b>                                  |
| Preoperative office visit            | 229,832 (52.1)                                                     | 308,397                                           | 28,347,459        | 118,902 (62.7)                                                     | 12,435,908 (78.2)                                        |
| <b>All medical services combined</b> | <b>292,139 (66.3)</b>                                              | <b>1,106,547</b>                                  | <b>44,496,882</b> | <b>437,269 (65.3)</b>                                              | <b>17,240,370 (63.3)</b>                                 |

- 1) The sum of beneficiaries undergoing each medical service and the number of services performed may exceed the total number of beneficiaries because some patients may have had more than one type of test or office visit during the preoperative period.
- 2) Total services and costs during the baseline period were calculated by first averaging the totals for each month separately, then calculating the monthly mean for the 11-month baseline period. The baseline mean number of services and costs were then subtracted from the number of services and costs, respectively, that occurred during the preoperative month to calculate the change over baseline.

**Table S5. Characteristics associated with preoperative testing prior to cataract surgery (models include office visits as a predictor)**

|                                                              | Baseline patient characteristics only | Ophthalmologist only | Ophthalmologist plus office visit | Ophthalmologist plus office visit plus all other variables |
|--------------------------------------------------------------|---------------------------------------|----------------------|-----------------------------------|------------------------------------------------------------|
| Characteristic                                               | AOR (95% CI)                          | AOR (95% CI)         | AOR (95% CI)                      | AOR (95% CI)                                               |
| Age <sup>1</sup>                                             | 1.19 (1.18-1.20)                      | -                    | -                                 | 1.08 (1.07-1.10)                                           |
| Sex                                                          |                                       |                      |                                   |                                                            |
| Male                                                         | Ref                                   | -                    | -                                 | Ref                                                        |
| Female                                                       | 1.04 (1.03-1.05)                      | -                    | -                                 | 0.97 (0.95-0.98)                                           |
| Race                                                         |                                       |                      |                                   |                                                            |
| White                                                        | Ref                                   | -                    | -                                 | Ref                                                        |
| Black                                                        | 1.04 (1.01-1.06)                      | -                    | -                                 | 1.03 (0.99-1.06)                                           |
| Other                                                        | 1.31 (1.28-1.35)                      | -                    | -                                 | 0.94 (0.91-0.98)                                           |
| Charlson Comorbidity Index                                   |                                       |                      |                                   |                                                            |
| 0-1                                                          | Ref                                   | -                    | -                                 | Ref                                                        |
| 2                                                            | 1.51 (1.49-1.54)                      | -                    | -                                 | 1.49 (1.46-1.52)                                           |
| 3+                                                           | 2.20 (2.16-2.23)                      | -                    | -                                 | 2.18 (2.14-2.22)                                           |
| US region                                                    |                                       |                      |                                   |                                                            |
| Pacific West                                                 | -                                     | -                    | -                                 | Ref                                                        |
| Northeast                                                    | -                                     | -                    | -                                 | 1.38 (1.27-1.50)                                           |
| Midwest                                                      | -                                     | -                    | -                                 | 0.74 (0.69-0.81)                                           |
| South                                                        | -                                     | -                    | -                                 | 0.76 (0.71-0.82)                                           |
| Mountain West                                                | -                                     | -                    | -                                 | 0.59 (0.53-0.66)                                           |
| Population density                                           |                                       |                      |                                   |                                                            |
| Urban                                                        | -                                     | -                    | -                                 | Ref                                                        |
| Rural                                                        | -                                     | -                    | -                                 | 0.95 (0.90-1.00)                                           |
| Primary care physicians per 100,000 residents <sup>1,2</sup> | -                                     | -                    | -                                 | 1.05 (1.02-1.08)                                           |
| Ophthalmologists per 100,000 residents <sup>2</sup>          | -                                     | -                    | -                                 | 1.17 (1.14-1.20)                                           |
| Ophthalmologist annual cataract surgery volume <sup>1</sup>  | -                                     | -                    | -                                 | 0.98 (0.97-0.98)                                           |
| Medicare expenditures per beneficiary in HRR (2010 USD)      |                                       |                      |                                   |                                                            |
| Q1 (\$6,911-\$8,689)                                         | -                                     | -                    | -                                 | Ref                                                        |
| Q2 (\$8,691-\$9,674)                                         | -                                     | -                    | -                                 | 1.06 (0.99-1.13)                                           |
| Q3 (\$9,693-\$10,311)                                        | -                                     | -                    | -                                 | 1.06 (0.99-1.13)                                           |
| Q4 (\$10,341-\$13,824)                                       | -                                     | -                    | -                                 | 1.20 (1.11-1.29)                                           |
| Surgical setting                                             |                                       |                      |                                   |                                                            |
| Ambulatory surgery center                                    | -                                     | -                    | -                                 | Ref                                                        |
| Hospital outpatient department                               | -                                     | -                    | -                                 | 1.42 (1.38-1.47)                                           |
| Ophthalmologist <sup>3</sup>                                 | -                                     | 3.40 (3.33-3.47)     | 2.90 (2.84-2.96)                  | 2.63 (2.58-2.68)                                           |
| Had preoperative office visit                                | -                                     | -                    | 6.12 (6.02-6.22)                  | 5.94 (5.84-6.03)                                           |
| <b>C-statistic for area under ROC<sup>5</sup></b>            | <b>0.60</b>                           | <b>0.78</b>          | <b>0.84</b>                       | <b>0.85</b>                                                |

1) Age, surgery volume, and primary care physicians per 100,000 residents were divided by 10 to allow for more meaningful odds ratios.

2) HRR variables current as of 2006.

3) The influence of the ophthalmologist was summarized by the median odds ratio (MOR), which is the median ratio of the odds of preoperative testing between equivalent patients of two randomly selected ophthalmologists (n=10,507).

**Table S6. Characteristics associated with having a preoperative office visit prior to cataract surgery**

|                                                              | Baseline patient characteristics only | Ophthalmologist only | Ophthalmologist plus all other variables |
|--------------------------------------------------------------|---------------------------------------|----------------------|------------------------------------------|
| Characteristic                                               | AOR (95% CI)                          | AOR (95% CI)         | AOR (95% CI)                             |
| Age <sup>1</sup>                                             | 1.15 (1.14-1.16)                      | -                    | 1.05 (1.04-1.06)                         |
| Sex                                                          |                                       |                      |                                          |
| Male                                                         | Ref                                   | -                    | Ref                                      |
| Female                                                       | 1.10 (1.09-1.11)                      | -                    | 1.08 (1.06-1.09)                         |
| Race                                                         |                                       |                      |                                          |
| White                                                        | Ref                                   | -                    | Ref                                      |
| Black                                                        | 0.91 (0.88-0.93)                      | -                    | 0.86 (0.84-0.89)                         |
| Other                                                        | 1.29 (1.26-1.33)                      | -                    | 0.97 (0.94-1.01)                         |
| Charlson Comorbidity Index                                   |                                       |                      |                                          |
| 0-1                                                          | Ref                                   | -                    | Ref                                      |
| 2                                                            | 1.32 (1.29-1.34)                      | -                    | 1.31 (1.29-1.34)                         |
| 3+                                                           | 1.60 (1.57-1.62)                      | -                    | 1.60 (1.57-1.63)                         |
| US region                                                    |                                       |                      |                                          |
| Pacific West                                                 | -                                     | -                    | Ref                                      |
| Northeast                                                    | -                                     | -                    | 2.04 (1.87-2.23)                         |
| Midwest                                                      | -                                     | -                    | 1.19 (1.10-1.30)                         |
| South                                                        | -                                     | -                    | 0.94 (0.86-1.01)                         |
| Mountain West                                                | -                                     | -                    | 0.62 (0.55-0.69)                         |
| Population density                                           |                                       |                      |                                          |
| Urban                                                        | -                                     | -                    | Ref                                      |
| Rural                                                        | -                                     | -                    | 0.75 (0.72-0.79)                         |
| Primary care physicians per 100,000 residents <sup>1,2</sup> | -                                     | -                    | 1.05 (1.02-1.08)                         |
| Ophthalmologists per 100,000 residents <sup>2</sup>          | -                                     | -                    | 1.17 (1.14-1.20)                         |
| Ophthalmologist annual cataract surgery volume <sup>1</sup>  | -                                     | -                    | 0.98 (0.97-0.98)                         |
| Medicare expenditures per beneficiary in HRR (2010 USD)      |                                       |                      |                                          |
| Q1 (\$6,911-\$8,689)                                         | -                                     | -                    | Ref                                      |
| Q2 (\$8,691-\$9,674)                                         | -                                     | -                    | 1.00 (1.94-1.07)                         |
| Q3 (\$9,693-\$10,311)                                        | -                                     | -                    | 0.91 (0.85-0.98)                         |
| Q4 (\$10,341-\$13,824)                                       | -                                     | -                    | 1.15 (1.07-1.23)                         |
| Surgical setting                                             |                                       |                      |                                          |
| Ambulatory surgery center                                    | -                                     | -                    | Ref                                      |
| Hospital outpatient department                               | -                                     | -                    | 0.86 (0.84-0.89)                         |
| Ophthalmologist <sup>3</sup>                                 | -                                     | 3.13 (3.07-3.20)     | 2.77 (2.72-2.82)                         |
| <b>C-statistic for area under ROC</b>                        | <b>0.57</b>                           | <b>0.79</b>          | <b>0.79</b>                              |

- 1) Age, surgery volume, and primary care physicians per 100,000 residents were divided by 10 to allow for more meaningful odds ratios.
- 2) HRR variables current as of 2006.
- 3) The influence of the ophthalmologist was summarized by the median odds ratio (MOR), which is the median ratio of the odds of preoperative testing between equivalent patients of two randomly selected ophthalmologists (n=10,507).
